# Supplementary material
Source: publisher figshare collection journal article supplement (https://acs.figshare.com/ndownloader/files/18105152)
Supplement: Supplementary file 1 [file 18105152]

## Supporting Information

### Mechanism and Kinetics of Isobutene Formation from Ethanol and Acetone over $\text{Zn}_x\text{Zr}_y\text{O}_z$

Julie E. Rorrer,<sup>[a,c]</sup> F. Dean Toste,<sup>[b,c]</sup> Alexis T. Bell<sup>[a,c]\*</sup>

[a] Department of Chemical and Biomolecular Engineering, University of California Berkeley, CA 94720 (USA)

[b] Department of Chemistry, University of California Berkeley, CA 94720 (USA)

[c] Chemical Sciences Division, Lawrence Berkeley National Laboratory, Berkeley, CA, 94720

\*Corresponding author email: [alexbell@berkeley.edu](mailto:alexbell@berkeley.edu)

| Table of Contents                                                                                                        | Page |
|--------------------------------------------------------------------------------------------------------------------------|------|
| Scheme S1: Mechanism of propene formation from ethanol and acetone via MPV reduction                                     | 1    |
| Figures S1-S5, Table S1: Supplemental catalyst characterization (ICP, DRIFTS-py, $\text{NH}_3$ -TPD, $\text{CO}_2$ -TPD) | 1-3  |
| Figure S6: Gas phase free energies of formation calculated from DFT                                                      | 3    |
| Figures S7-S17: Supplemental kinetic measurements                                                                        | 3-6  |
| Figure S18: Arrhenius plots for rate constants given in Table S2                                                         | 7    |
| Table S2: Kinetic Parameters from Model 2                                                                                | 7    |
| Derivation of Rate Expressions                                                                                           | 7-9  |

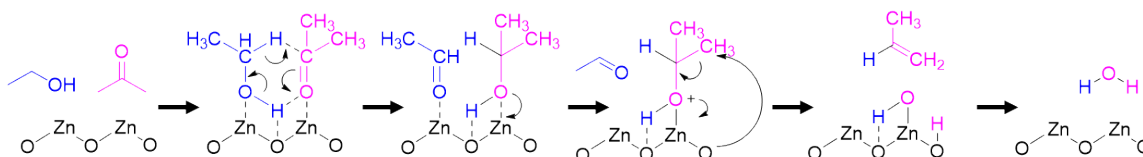

**Scheme S1:** Production of propene from ethanol and acetone via MPV reduction of acetone to produce isopropanol, followed by dehydration to produce propene.

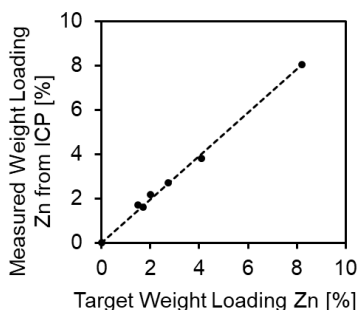

**Figure S1:** Target weight loading of Zn for incipient wetness impregnation method versus measured weight loading from ICP conducted by Galbriath Laboratories.

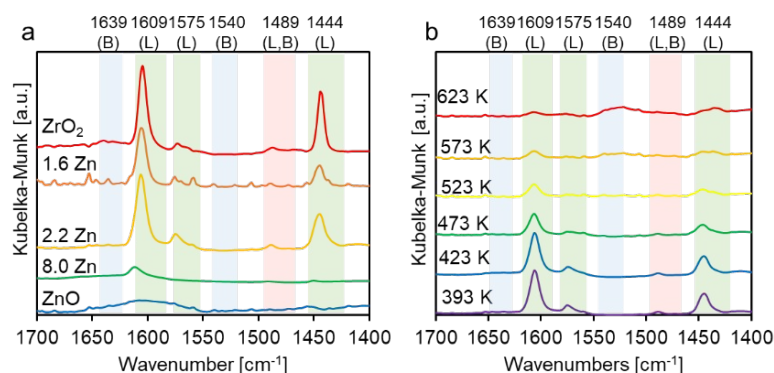

**Figure S2:** a) DRIFTS-py at 393 K for ZnO, ZrO<sub>2</sub>, and Zn<sub>x</sub>Zr<sub>y</sub>O<sub>z</sub> with varying weight loadings of Zn. Catalysts diluted with KBr (250 mg KBr, 50 mg catalyst) except for ZnO which was not diluted by KBr, b) DRIFTS- py as a function of temperature over Zn<sub>x</sub>Zr<sub>y</sub>O<sub>z</sub> (2.2 wt% Zn).

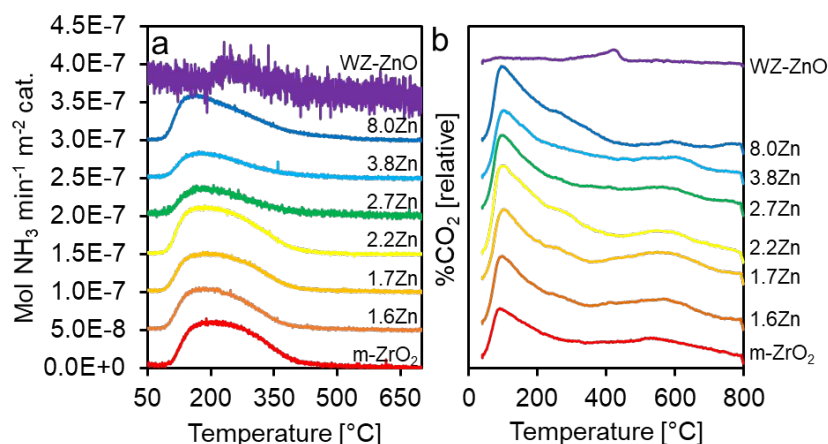

**Figure S3:** a) NH<sub>3</sub>-TPD profiles of catalysts, b) CO<sub>2</sub>-TPD profiles of catalysts.

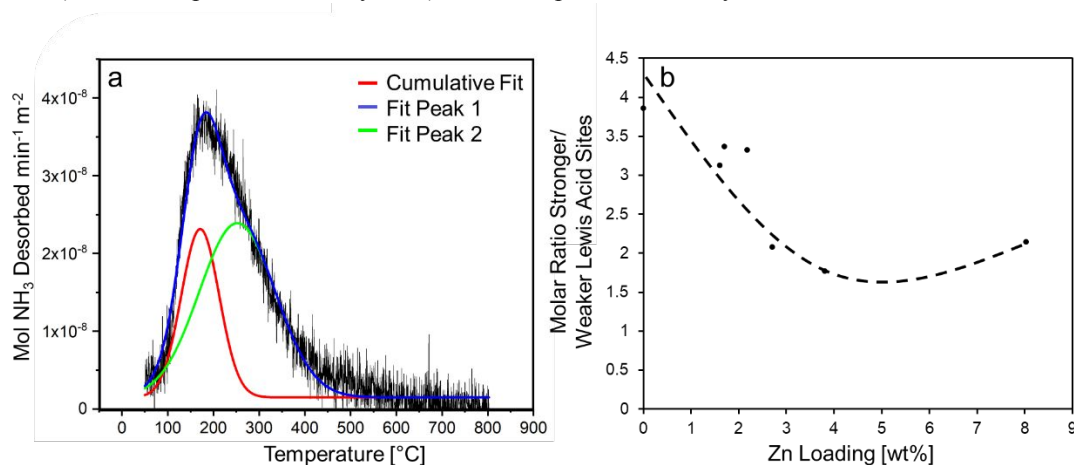

**Figure S4:** a) Representative Peak Deconvolution for NH<sub>3</sub> desorption as a function of temperature for Zn<sub>x</sub>Zr<sub>y</sub>O<sub>z</sub> (2.7wt% Zn), performed in Origin, b) Ratio of moles NH<sub>3</sub> desorbed from stronger Lewis acid sites (peak temperature 230 °C, Fit Peak 2) over weaker Lewis acid sites (peak temperature 160 °C, Fit Peak 1). Dashed lines are to guide the eye.

**Table S1.** Ratio of Stronger to Weaker Lewis Acid Sites on  $\text{ZrO}_2$  and  $\text{Zn}_x\text{Zr}_y\text{O}_z$  measured by  $\text{NH}_3$  TPD.

| Wt% Zn<br>( $\text{Zn}_x\text{Zr}_y\text{O}_z$ ) | Molar Ratio of<br>Stronger/ Weaker<br>Lewis Acid Sites | Total Lewis<br>Acidity<br>( $\mu\text{mol NH}_3/\text{m}^2$ ) | Weak Lewis<br>Acidity<br>( $\mu\text{mol NH}_3/\text{m}^2$ ) <sup>a</sup> | Strong Lewis<br>Acidity<br>( $\mu\text{mol NH}_3/\text{m}^2$ ) <sup>b</sup> |
|--------------------------------------------------|--------------------------------------------------------|---------------------------------------------------------------|---------------------------------------------------------------------------|-----------------------------------------------------------------------------|
| 0 ( $\text{ZrO}_2$ )                             | 3.9                                                    | 2.6                                                           | 0.5                                                                       | 2.1                                                                         |
| 1.6                                              | 3.1                                                    | 2.2                                                           | 0.5                                                                       | 1.7                                                                         |
| 1.7                                              | 3.4                                                    | 2.2                                                           | 0.5                                                                       | 1.7                                                                         |
| 2.18                                             | 3.3                                                    | 2.6                                                           | 0.6                                                                       | 2.0                                                                         |
| 2.7                                              | 2.1                                                    | 1.5                                                           | 0.5                                                                       | 1.0                                                                         |
| 3.8                                              | 1.8                                                    | 1.8                                                           | 0.6                                                                       | 1.2                                                                         |
| 8.02                                             | 2.1                                                    | 2.6                                                           | 0.8                                                                       | 1.8                                                                         |

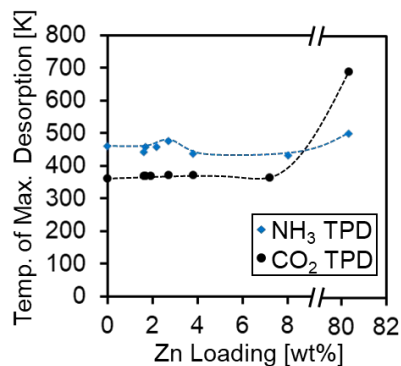

**Figure S5:** Temperature of maximum desorption of  $\text{NH}_3$  (blue diamond) and  $\text{CO}_2$  (black circle) during temperature-programmed-desorption (TPD) experiments for  $\text{ZrO}_2$ ,  $\text{ZnO}$ , and the  $\text{Zn}_x\text{Zr}_y\text{O}_z$  catalysts.

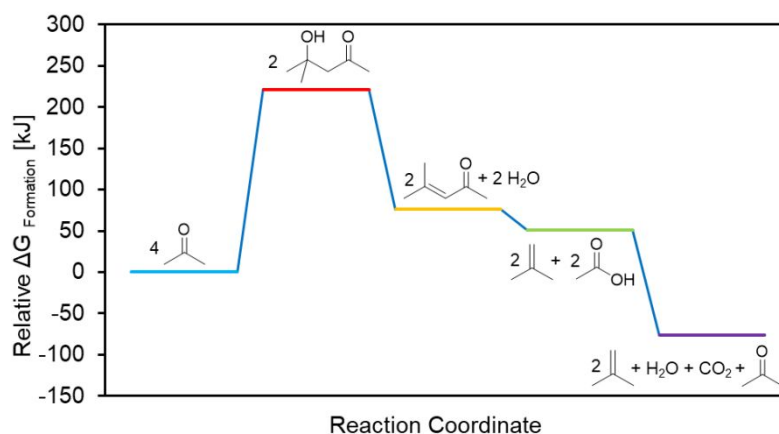

**Figure S6:** Gas phase free energies of formation calculated from DFT. Values are normalized relative to acetone and are expressed on a basis of kJ per number of moles shown by the stoichiometry for each intermediate step. Details for Qchem Calculations: Geometry minimization: exchange omega B97X-D, basis 6-31G\*\*, Frequency calculation: exchange omega B97X-D, basis 6-31G\*\*, Single point energy: exchange omega B97X-D, basis 6-311++G(3df,3pd).

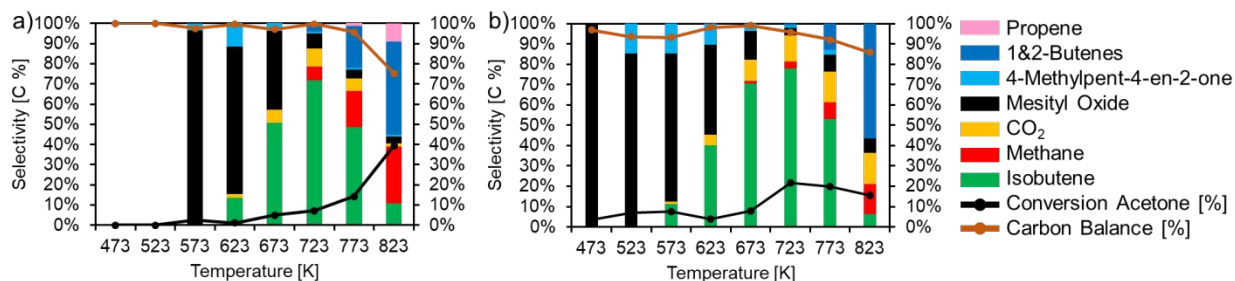

**Figure S7:** Effect of temperature on the acetone to isobutene reaction. Reaction Conditions: 0.4 kPa acetone, 17.8 kPa H<sub>2</sub>O, S/C 8, 50 mL min<sup>-1</sup> He, a) 283.5 mg ZnO, b) 20.5 mg Zn<sub>x</sub>Zr<sub>y</sub>O<sub>z</sub> (2.2 wt% Zn). Catalyst deactivation for both catalysts began at 773 K, data recorded is from initial rate.

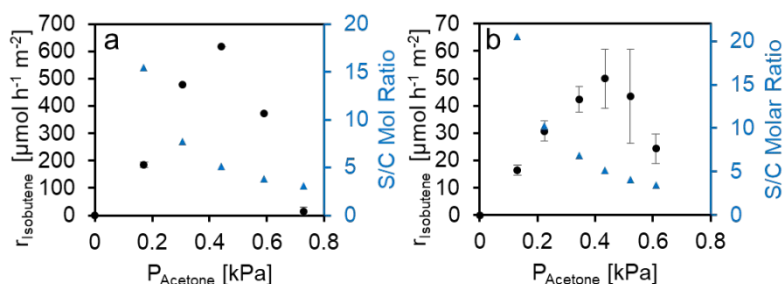

**Figure S8:** Effect of steam to carbon ratio on reaction rates for the acetone to isobutene reaction over a) Zn<sub>x</sub>Zr<sub>y</sub>O<sub>z</sub> (2.2 wt% Zn) and b) ZnO (61.4 mg). Reaction conditions: 723 K, 150 mL min<sup>-1</sup> He with a) 15 kPa H<sub>2</sub>O and b) 13 kPa H<sub>2</sub>O.

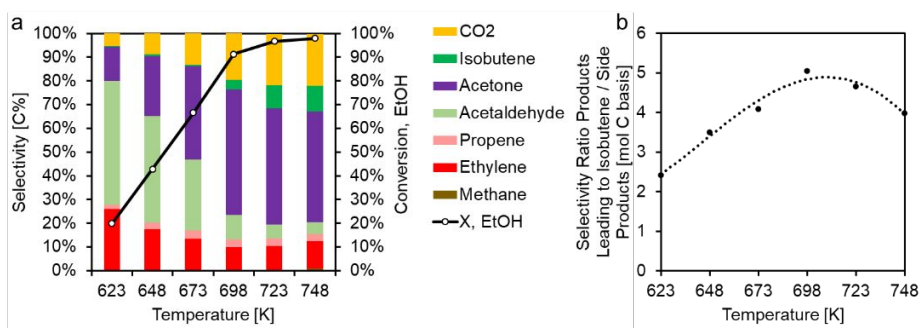

**Figure S9:** a) Effect of temperature on the ethanol to isobutene reaction over Zn<sub>x</sub>Zr<sub>y</sub>O<sub>z</sub> (2.2 wt% Zn). Reaction Conditions: 0.1 kPa acetone, 30 kPa H<sub>2</sub>O, 50 mL min<sup>-1</sup> He, atmospheric pressure, b) Selectivity ratio of productive products leading to isobutene (acetaldehyde, acetone, and isobutene) over undesired side products (methane, ethylene, and propene), demonstrating that 698 K is the ideal temperature for maximizing the productive cascade reaction.

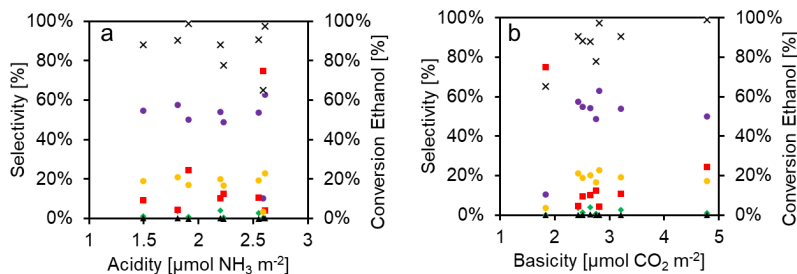

**Figure S10:** a) Effect of acidity (measured by NH<sub>3</sub>-TPD) on the selectivity for the ethanol to isobutene reaction, b) effect of basicity (measured by CO<sub>2</sub>-TPD) on the ethanol to isobutene reaction. Reaction conditions: 698 K, 1 kPa EtOH, S/C 4, 50 mL min<sup>-1</sup> He, WHSV 0.7, spacetime normalized by BET surface area.

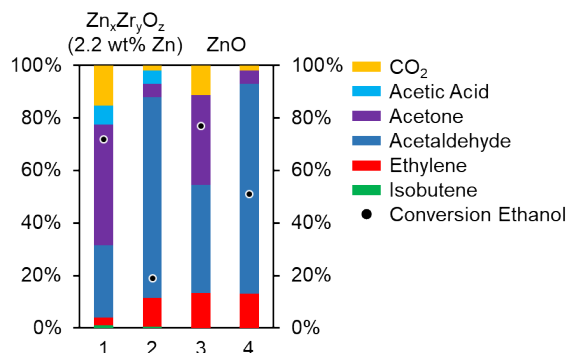

**Figure S11:** Ethanol reactions over  $\text{Zn}_x\text{Zr}_y\text{O}_z$  (2.2 wt% Zn) and ZnO in the presence and absence of water. Entries 1, 2:  $\text{Zn}_x\text{Zr}_y\text{O}_z$  (2.2 wt% Zn) 4.8 mg, entries 3, 4: 58 mg ZnO, 0.2 kPa acetone, entries 1, 3: 13 kPa  $\text{H}_2\text{O}$ , entries 2, 4: 0 kPa  $\text{H}_2\text{O}$ , 150 mL  $\text{min}^{-1}$  He, 723 K. As observed by entries 1 and 2, in the absence water, the selectivity towards ethylene (red) increases over  $\text{Zn}_x\text{Zr}_y\text{O}_z$  (2.2 wt% Zn) and the conversion dramatically decreases. Over ZnO (entries 3 and 4), the absence of water also decreases the conversion and significantly decreases the conversion of acetaldehyde to acetone.

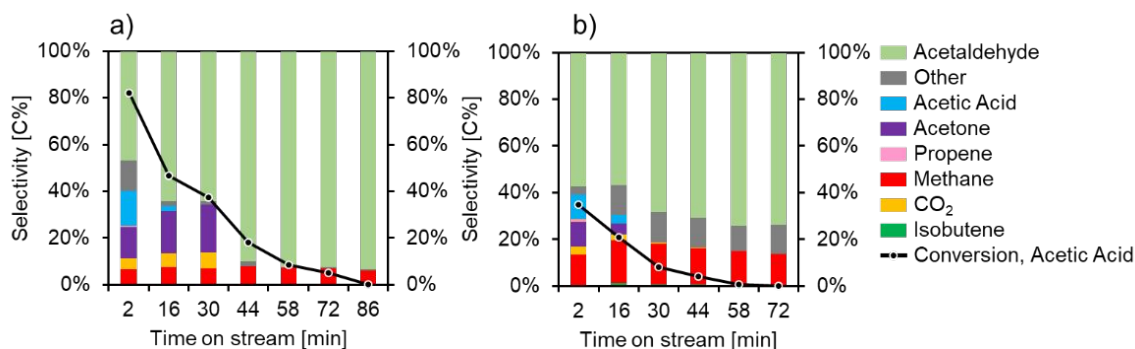

**Figure S12:** Reactions of ethanol and acetaldehyde mixtures in the absence of water over a) ZnO (60.1 mg), and b)  $\text{Zn}_x\text{Zr}_y\text{O}_z$  2.2 wt% Zn (4.8 mg). Reaction conditions: 0.11 kPa EtOH, 0.03 kPa acetaldehyde, 723 K, 150 mL  $\text{min}^{-1}$  He, atmospheric pressure.

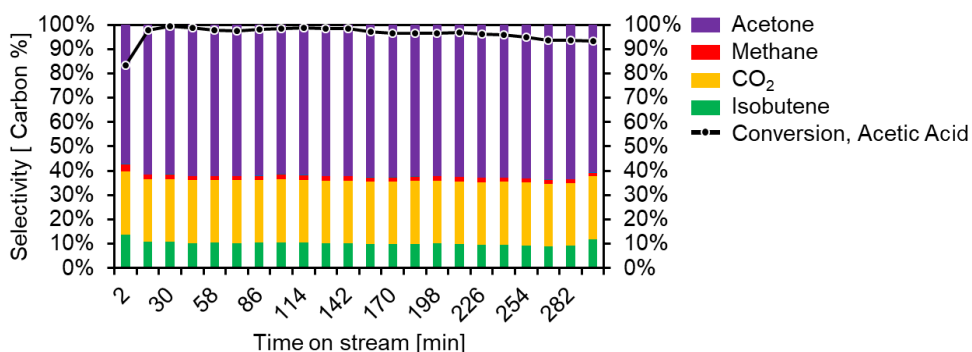

**Figure S13:** Effect of time on stream for the reaction of acetic acid to isobutene at 723 K. Reaction conditions: 22.3 mg  $\text{Zn}_x\text{Zr}_y\text{O}_z$  2.2 wt% Zn, 150 mL  $\text{min}^{-1}$  He, 0.21 kPa acetic acid, 11.4 kPa  $\text{H}_2\text{O}$ , S/C 5.4. Reaction was stable for over 5 h.

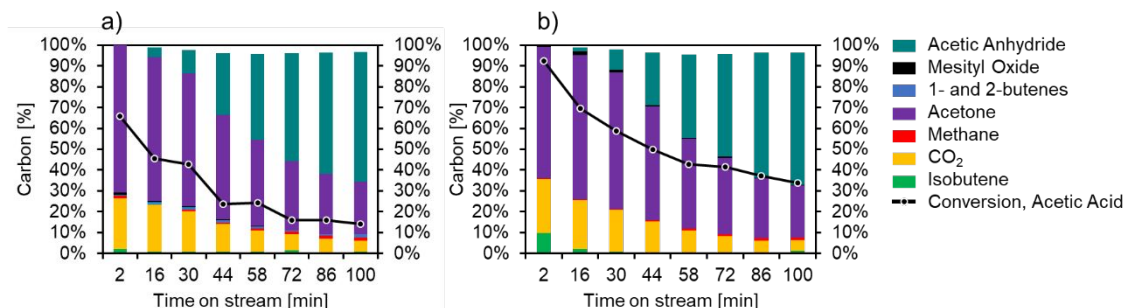

**Figure S14:** Reactions of acetic acid in the absence of water over a) ZnO and b)  $\text{Zn}_x\text{Zr}_y\text{O}_z$  2.2 wt% Zn. Reaction conditions: a) 723 K, 0.22 kPa acetic acid, 60.1 mg catalyst,  $150 \text{ mL min}^{-1}$  He; b) 723 K, 0.26 kPa acetic acid, 4.9 mg catalyst,  $150 \text{ mL min}^{-1}$  He.

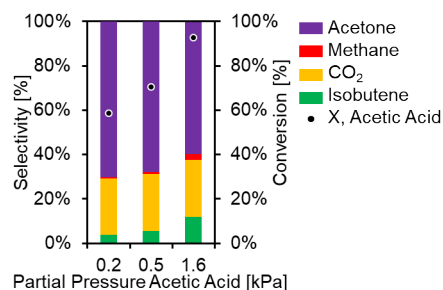

**Figure S15:** Effect of partial pressure for the reaction of acetic acid to produce isobutene over  $\text{Zn}_x\text{Zr}_y\text{O}_z$  2.2 wt% Zn. Reaction conditions: 723 K, 20.8 mg  $\text{Zn}_x\text{Zr}_y\text{O}_z$  2.2 wt% Zn,  $15\text{-}150 \text{ mL min}^{-1}$  He, S/C 5.

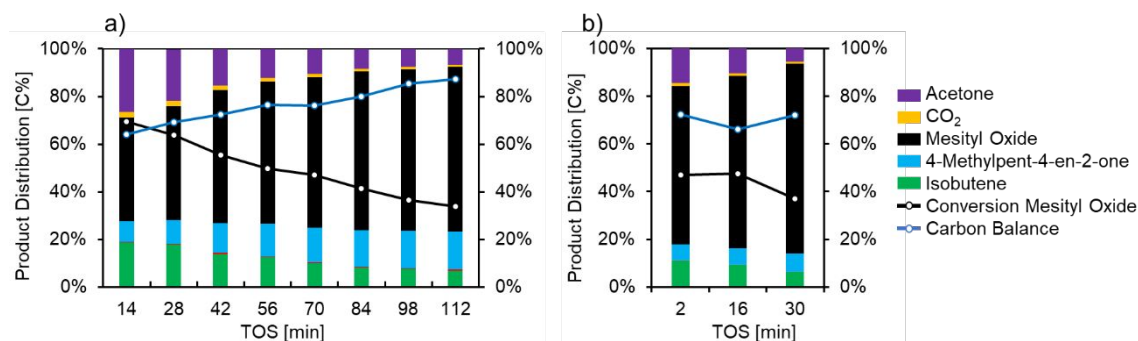

**Figure S16:** Deactivation of catalysts for the reaction of mesityl oxide and water over a) 4.8 mg  $\text{Zn}_x\text{Zr}_y\text{O}_z$  2.2 wt% Zn and b) 60.8 mg ZnO. Reaction Conditions: 723 K,  $150 \text{ mL min}^{-1}$  He, S/C 6.3, 13 kPa  $\text{H}_2\text{O}$ , 0.012 kPa initial 4-methylpent-4-en-2-one, 0.12 kPa initial Mesityl Oxide.

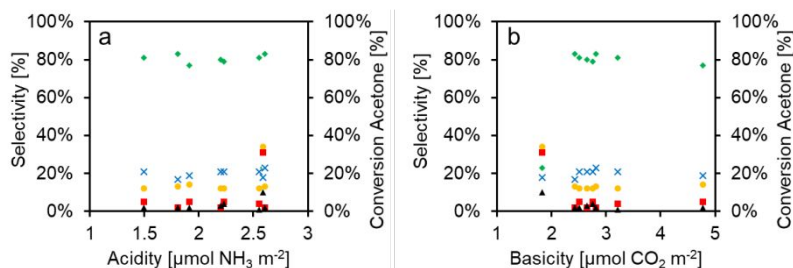

**Figure S17:** Conversion and selectivity for the acetone to isobutene reaction as a function of a) acidity [ $\mu\text{mol NH}_3 \text{ m}^{-2}$ ] and b) basicity [ $\mu\text{mol CO}_2 \text{ m}^{-2}$ ]. Reaction conditions: 698 K, 0.5 kPa acetone, 30 kPa  $\text{H}_2\text{O}$ , S/C 8.2,  $50 \text{ mL min}^{-1}$  He,  $1 \text{ m}^2$  catalyst.

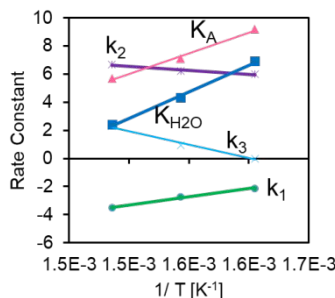

**Figure S18:** Arrhenius plots for rate constants given in **Table S2**.

**Table S2.** Kinetic Parameters from Model 2.

| T [K]                                              | $k_1$<br>[ $\mu\text{mol h}^{-1} \text{m}^{-2}$ ] | $k_2$<br>[ $\mu\text{mol h}^{-1} \text{m}^{-2}$ ] | $k_3$<br>[ $\mu\text{mol h}^{-1} \text{m}^{-2} \text{kPa}^{-1}$ ] | $K_A$<br>[ $\text{kPa}^{-1}$ ] | $k_{H_2O}$<br>[ $\text{kPa}^{-1}$ ] | $k_{-1}$<br>[ $\mu\text{mol h}^{-1} \text{m}^{-2}$ ] |
|----------------------------------------------------|---------------------------------------------------|---------------------------------------------------|-------------------------------------------------------------------|--------------------------------|-------------------------------------|------------------------------------------------------|
| 623                                                | 0.12                                              | 400                                               | 1                                                                 | 9000                           | 1000                                | 1000                                                 |
| 648                                                | 0.065                                             | 500                                               | 2.6                                                               | 1200                           | 75                                  | 1000                                                 |
| 673                                                | 0.03                                              | 800                                               | 10                                                                | 300                            | 11                                  | 1000                                                 |
| Apparent $E_A$ [kJ mol <sup>-1</sup> ]             | -96 ± 8                                           | 48 ± 11                                           | 160 ± 19                                                          |                                |                                     |                                                      |
| Apparent ln[A]                                     | -21 ± 2                                           | 15 ± 2                                            | 31 ± 4                                                            |                                |                                     |                                                      |
| $\Delta H_{\text{ads}}$ [kJ mol <sup>-1</sup> ]    |                                                   |                                                   |                                                                   | -238 ± 20                      | -315 ± 20                           |                                                      |
| $\Delta S$ [kJ mol <sup>-1</sup> K <sup>-1</sup> ] |                                                   |                                                   |                                                                   | 0.3 ± 0.03                     | 0.45 ± 0.03                         |                                                      |

### Derivation of Rate expressions for isobutene formation:

The elementary steps for the formation of isobutene from acetone are given by equations [S1]-[S7], where the partial pressures of the reactants and intermediates are given by: acetone [A], water [H<sub>2</sub>O], diacetone alcohol [DAA\*\*], acetic acid [AA\*], carbon dioxide [CO<sub>2</sub>], isobutene [IB], and mesityl oxide [MO]. The active site, [\*] represents a Lewis acid/base pair.

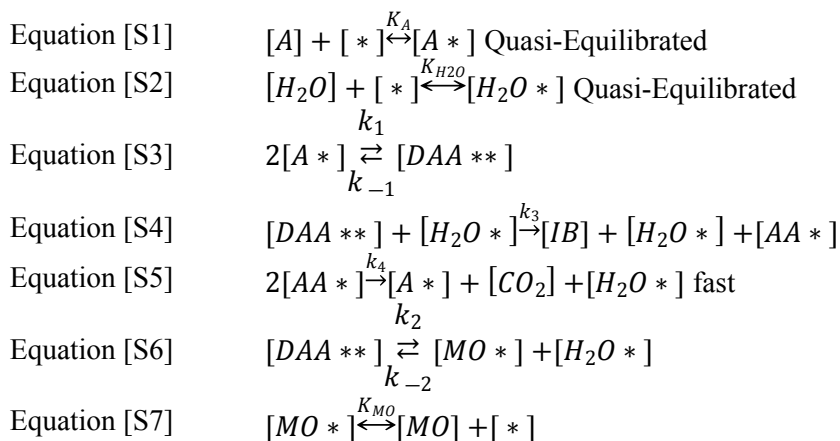

Assuming steps in equations [S1] and [S2] are quasi-equilibrated:

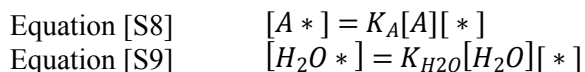

Applying pseudo steady state (PSSH) approximation to [DAA\*\*]:

Equation [S10] 
$$\frac{d[DAA^{**}]}{dt} = k_1[A^*]^2 - k_{-1}[DAA^{**}] - k_2[DAA^{**}] + k_{-2}[MO^*][H_2O^*] - k_3[DAA^{**}]$$

Rearrangement of Equation [S10] yields Equation [S11]:

Equation [S11] 
$$[DAA^{**}] = \frac{k_1[A^*]^2 + k_{-2}[MO^*][H_2O^*]}{(k_{-1} + k_2 + k_3[H_2O])}$$

Substitution of  $[A^*]$  and  $[H_2O^*]$  from Equations [S8] and [S9], and assuming surface mesityl oxide concentration is low yields Equation [S12]:

Equation [S12] 
$$[DAA^{**}] = \frac{k_1 K_A^2 [A]^2 [^*]^2}{(k_{-1} + k_2 + k_3[H_2O])}$$

**Model 1: Assuming rate limiting step for isobutene formation is C-C coupling of acetone:**

Equation [S13] 
$$r_{IB} = k_1[A^*]^2 - k_{-1}[DAA^{**}]$$

Substitution of  $[DAA^{**}]$  from Equation [S12] into Equation [S13] yields Equation [S14]:

Equation [S14] 
$$r_{IB} = k_1[A^*]^2 - k_{-1} \left( \frac{k_1 K_A^2 [A]^2 [^*]^2}{(k_{-1} + k_2 + k_3[H_2O])} \right)$$

Substitution of  $[A^*]$  from Equation [S8] and rearrangement gives:

Equation [S15] 
$$\frac{r_{IB}}{[^*]^2} = k_1 K_A^2 [A]^2 - k_{-1} \left( \frac{k_1 K_A^2 [A]^2}{(k_{-1} + k_2 + k_3[H_2O])} \right)$$

The Site Balance is given by Equation [S16], where it is assumed that surface mesityl oxide concentration is low, and all sites are occupied by either acetone or water:

Equation [S16] 
$$L_1 = [A^*] + [H_2O^*]$$

Substitution of  $[A^*]$  and  $[H_2O^*]$  from Equations [S8] and [S9] yields Equation [S17]:

Equation [S17] 
$$\frac{L_1}{[^*]} = (K_A[A] + K_{H_2O}[H_2O])$$

Substitution of the Site Balance in Equation [S17] for  $[^*]$  into Equation [S15] yields Equation [S18]:

Equation [S18] 
$$r_{IB} = \frac{k_1 K_A^2 [A]^2 - k_{-1} \left( \frac{k_1 K_A^2 [A]^2}{(k_{-1} + k_2 + k_3[H_2O])} \right)}{(K_A[A] + K_{H_2O}[H_2O])^2}$$

Representing Equation [S18] in partial pressure notation yields Equation [S19], which is equivalent to Equation 1 in the Main Manuscript:

$$\text{Equation [S19]} \quad r_{IB} = \frac{k_1 K_A^2 P_A^2 - k_{-1} \left( \frac{k_1 K_A^2 P_A^2}{(k_{-1} + k_2 + k_3 P_{H_2O})} \right)}{(K_A P_A + K_{H_2O} P_{H_2O})^2}$$

**Model 2: Assuming rate limiting step is the decomposition of diacetone alcohol:**

$$\text{Equation [S20]} \quad r_{IB} = k_3 [DAA^{**}] [H_2O^*]$$

Substitution of [DAA\*\*] and [H<sub>2</sub>O\*] from Equations [S12] and [S9] and rearrangement gives Equation [S21]:

$$\text{Equation [S21]} \quad \frac{r_{IB}}{[*]^3} = k_3 K_{H_2O} [H_2O] \frac{k_1 K_A^2 [A]^2}{(k_{-1} + k_2 + k_3 [H_2O])}$$

Substitute of the Site Balance given by Equation [S17] yields Equation [S22]:

$$\text{Equation [S22]} \quad r_{IB} = \frac{\frac{k_1 K_A^2 [A]^2 k_3 K_{H_2O} [H_2O]}{(k_{-1} + k_2 + k_3 [H_2O])}}{(K_A [A] + K_{H_2O} [H_2O])^3}$$

Representing Equation [S22] in partial pressure notation yields Equation [S23], which is equivalent to Equation 2 in the Main Manuscript:

$$\text{Equation [S23]} \quad r_{IB} = \frac{\frac{k_1 K_A^2 P_A^2 k_3 K_{H_2O} P_{H_2O}}{(k_{-1} + k_2 + k_3 P_{H_2O})}}{(K_A P_A + K_{H_2O} P_{H_2O})^3}$$
